# Supplementary material for: Rational design of Ni/Ni2P heterostructures encapsulated in 3D porous carbon networks for improved lithium storage
Source: Royal Society of Chemistry journal article supplement (doi:10.1039/c9dt03011e), 2019-01-01
Supplement: c9dt03011e1.pdf [file c9dt03011e1.pdf]

## Rational design of Ni/Ni<sub>2</sub>P heterostructures encapsulated in 3D porous carbon networks for improved lithium storage

Jiapeng He,<sup>a</sup> Lu Shen,<sup>a</sup> Cuiping Wu,<sup>a</sup> Can Guo,<sup>a</sup> Qingpeng Wang,<sup>b</sup> Zhifang Liu,<sup>b</sup>  
Shun Yang,<sup>a,\*</sup> Qinghong Wang<sup>a,\*</sup>

<sup>a</sup>*School of Chemistry and Materials Science, Jiangsu Key Laboratory of Green Synthetic  
Chemistry for Functional Materials, Jiangsu Normal University, Xuzhou, Jiangsu 221116, China*

<sup>b</sup>*Institute of Biopharmaceutical Research, Liaocheng University, Liaocheng 252059, China*

\*Corresponding author.

E-mail address: [wangqh@jsnu.edu.cn](mailto:wangqh@jsnu.edu.cn) (Q.H. Wang); [yangshun@jsnu.edu.cn](mailto:yangshun@jsnu.edu.cn) (S. Yang)

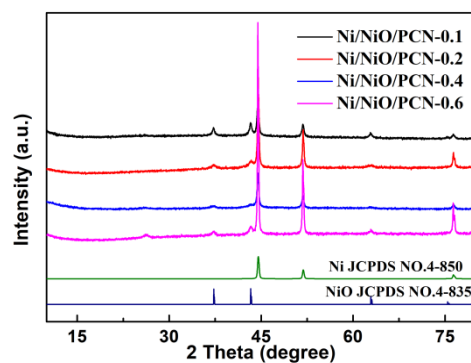

**Fig. S1** XRD patterns of the as-prepared Ni/NiO/PCN precursors.

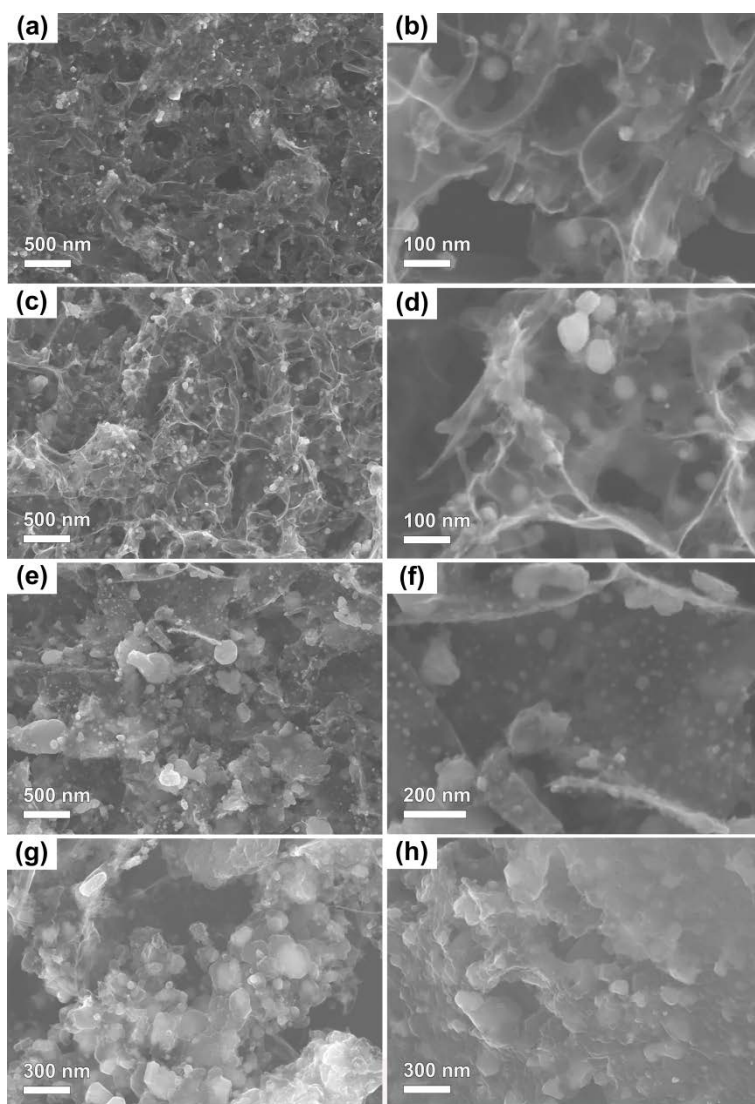

**Fig. S2** SEM images of the (a, b) Ni/NiO/PCN-0.1 precursor, (c, d) Ni/NiO/PCN-0.2 precursor, (e, f) Ni/NiO/PCN-0.4 precursor and (g, h) Ni/NiO/PCN-0.6 precursor.

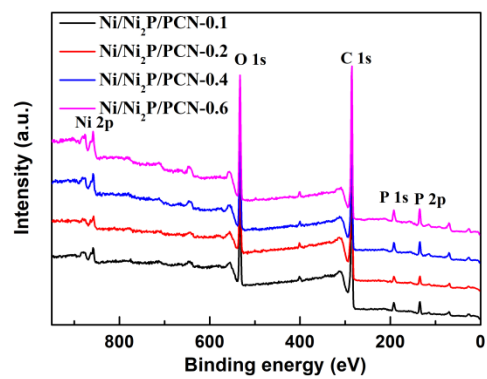

**Fig. S3** XPS spectrum of the as-prepared Ni/Ni<sub>2</sub>P/PCN composites.

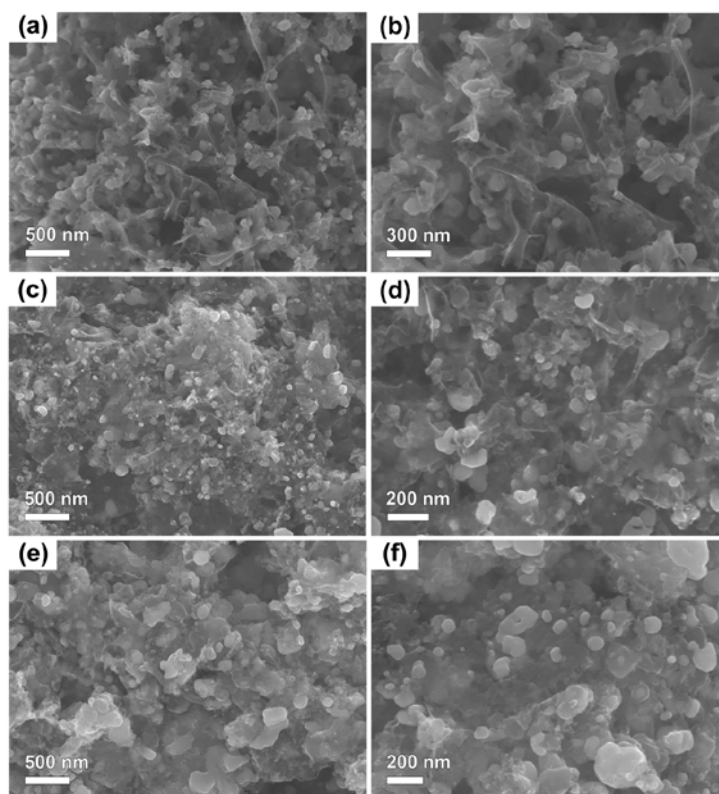

**Fig. S4** SEM images of the (a, b) Ni/Ni<sub>2</sub>P/PCN-0.1, (c, d) Ni/Ni<sub>2</sub>P/PCN-0.4 and (e, f) Ni/Ni<sub>2</sub>P/PCN-0.6 composites.

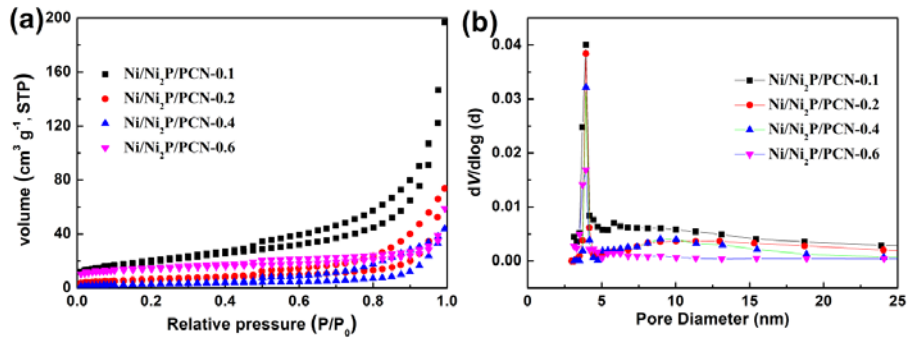

**Fig. S5** (a) Nitrogen adsorption-desorption isotherms and (b) Pore size distribution of Ni/Ni<sub>2</sub>P/PCN composites.

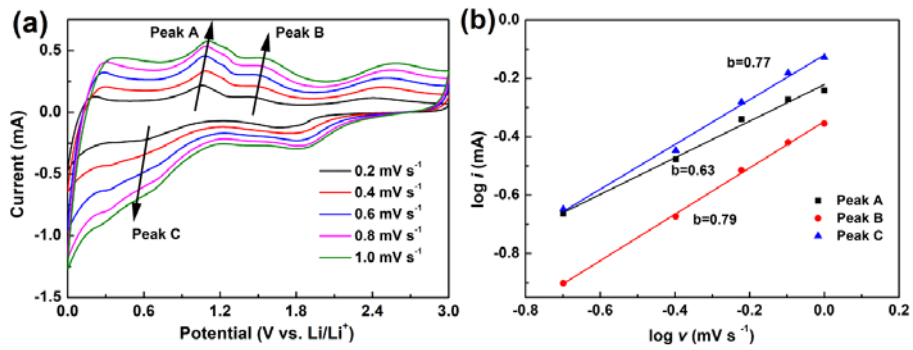

**Fig. S6** (a) CV curves of Ni/Ni<sub>2</sub>P/PCN-0.2 electrode for Li-ion storage with increasing sweep rates from 0.2 to 1.0 mV s<sup>-1</sup>, (b) Calculation of the *b* values.

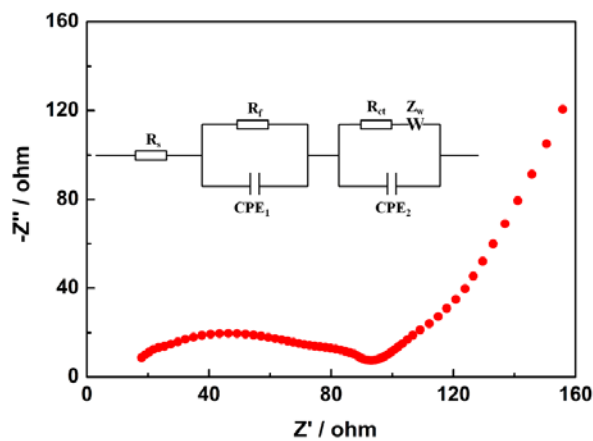

**Fig. S7** Nyquist plots of the Ni/Ni<sub>2</sub>P/PCN-0.2 electrode after 300 cycles and the relevant equivalent circuit.

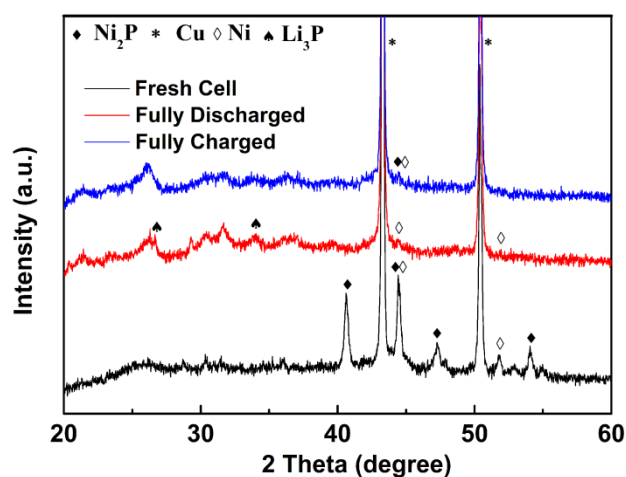

**Fig. S8** XRD patterns of the Ni/Ni<sub>2</sub>P/PCN-0.2 electrodes after 300cycles.

**Table S1** The contents of each component in the Ni/Ni<sub>2</sub>P/PCN composites according to the XPS results.

| Material                     | Ni <sub>2</sub> P (wt%) | Ni (wt%) | C (wt%) |
|------------------------------|-------------------------|----------|---------|
| Ni/Ni <sub>2</sub> P/PCN-0.1 | 24.9                    | 0.8      | 74.3    |
| Ni/Ni <sub>2</sub> P/PCN-0.2 | 32.3                    | 2.5      | 65.2    |
| Ni/Ni <sub>2</sub> P/PCN-0.4 | 35.9                    | 2.6      | 61.5    |
| Ni/Ni <sub>2</sub> P/PCN-0.6 | 42.7                    | 2.8      | 54.5    |

**Table S2** Simulated impedance parameters ( $R_s$ ,  $R_{ct}$ ) of the Ni/Ni<sub>2</sub>P/PCN samples before cycling.

| Material                     | $R_s$ ( $\Omega$ ) | $R_{ct}$ ( $\Omega$ ) |
|------------------------------|--------------------|-----------------------|
| Ni/Ni <sub>2</sub> P/PCN-0.1 | 9.6                | 169.3                 |
| Ni/Ni <sub>2</sub> P/PCN-0.2 | 6.3                | 127.6                 |
| Ni/Ni <sub>2</sub> P/PCN-0.4 | 5.0                | 98.6                  |
| Ni/Ni <sub>2</sub> P/PCN-0.6 | 5.7                | 83.3                  |
